# Supplementary material
Source: Springer Nature journal article supplement (https://www.springermedizin.de/resource/supplementary/12913_2011_1830_MOESM1_ESM.pdf/9529016)

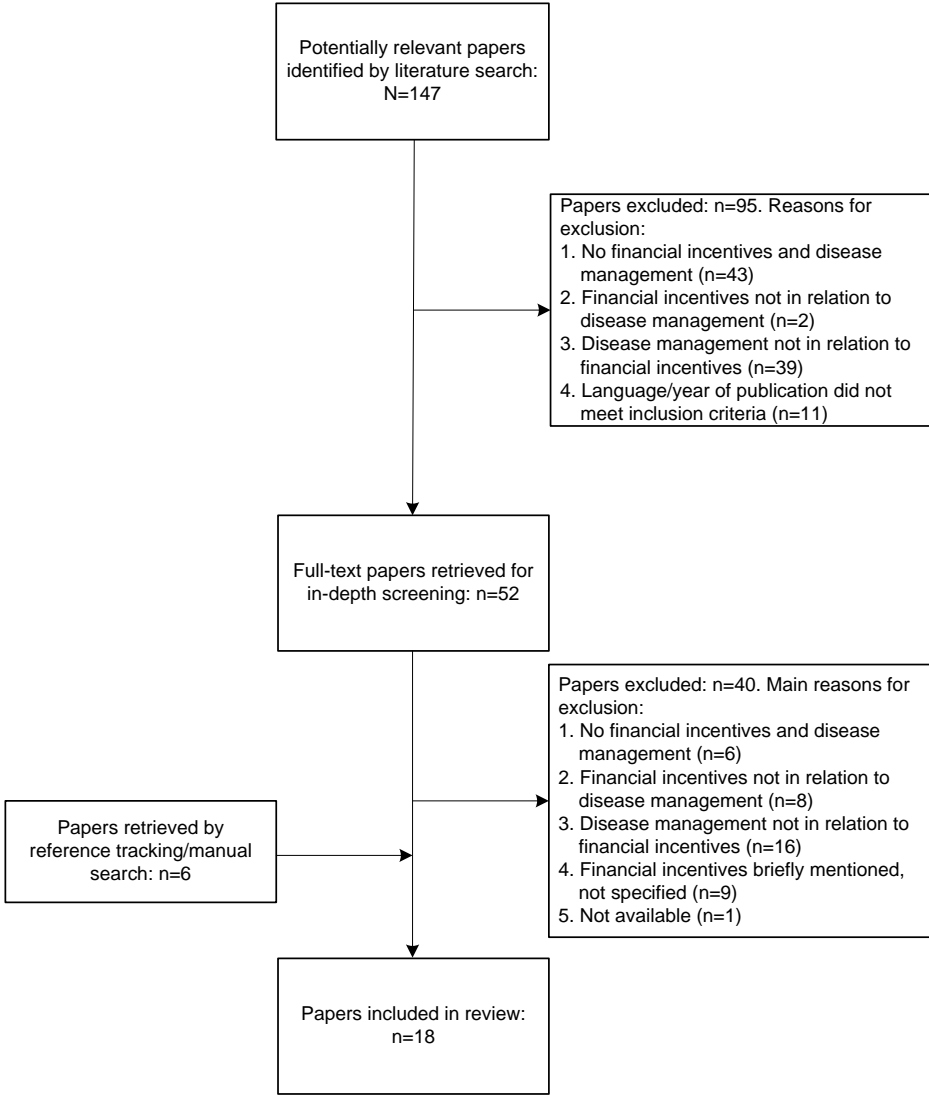

Supplement: MOESM1 [file 9529016]
